# Supplementary material for: Differential MicroRNA Landscape Triggered by Estrogens in Cancer Associated Fibroblasts (CAFs) of Primary and Metastatic Breast Tumors
Source: MDPI journal article supplement (doi:10.3390/cancers11030412), 2019-03-23
Supplement: s1 [file s1]

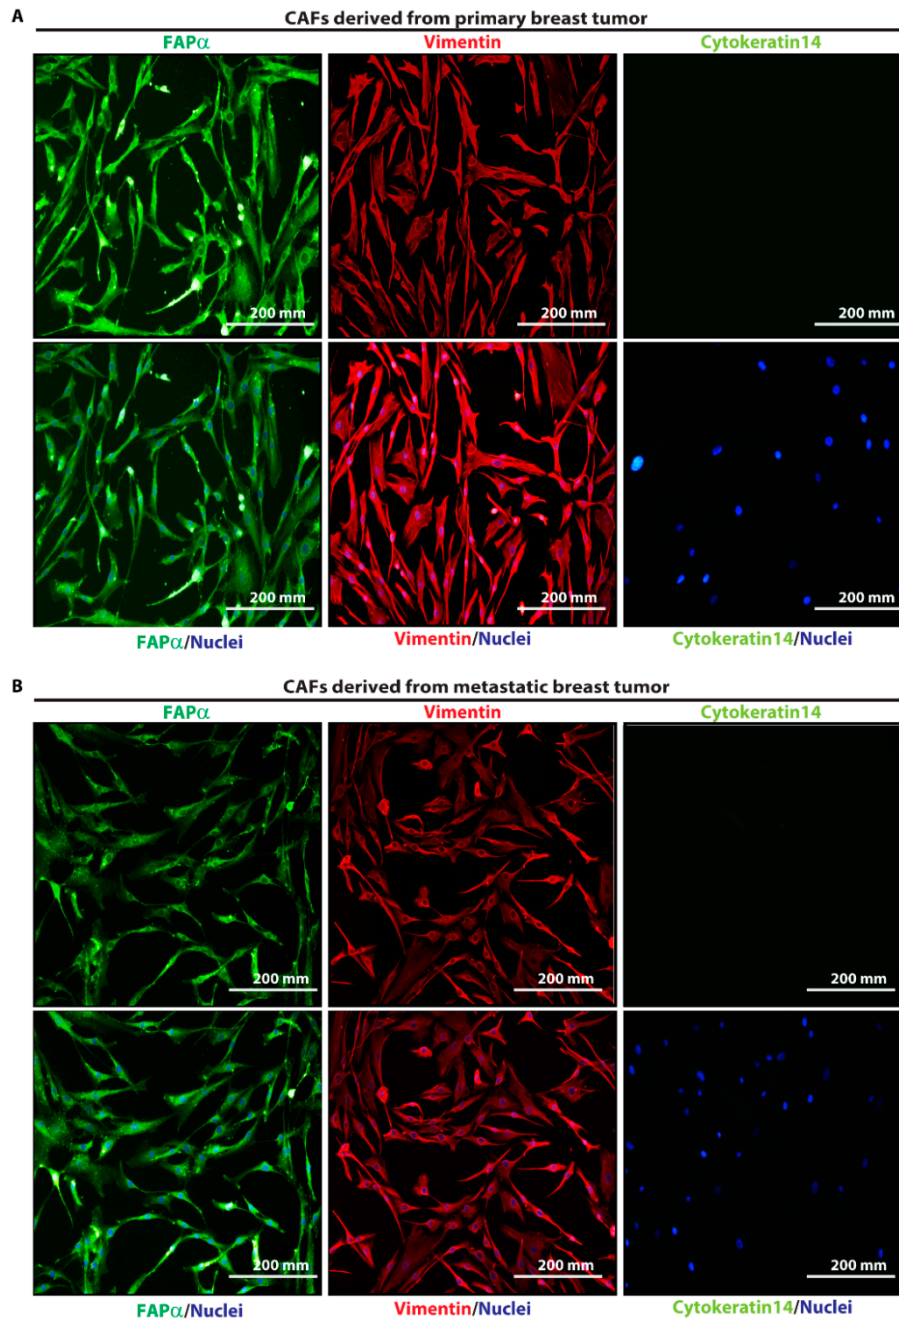

**Figure S1.** Representative images of CAFs derived from primary (**A**) and metastatic (**B**) breast tumors. CAFs were immunostained by anti-FAP $\alpha$ , anti-Vimentin and anti-Cytokeratin14 antibodies. Green signal: FAP $\alpha$  and Cytokeratin14; Red signal: Vimentin; Blue signal: Nuclei. Scale bar: 200 $\mu$ m.
